# Supplementary material for: Exploring the binding mode and thermodynamics of inverse agonists against estrogen-related receptor alpha
Source: Royal Society of Chemistry journal article supplement (doi:10.1039/c9ra10697a), 2020-01-01
Supplement: c9ra10697a1.pdf [file c9ra10697a1.pdf]

## Exploring the Binding Mode and Thermodynamics of Inverse Agonists against Estrogen-related Receptor alpha

Konda Reddy Karnati,<sup>a</sup> Yongli Du<sup>b</sup>, Yixuan Wang<sup>a\*</sup>

<sup>a</sup>Department of Chemistry and Forensic Science, Albany State University, Albany, GA 31705, USA

<sup>b</sup>School of Chemical and Pharmaceutical Engineering, Qilu University of Technology, Jinan,  
Shandong 250353, China

**Table S1.** Molecular docking results for the ERR $\alpha$  and inverse agonist ligands.

| Compound         | Autodock Binding Energy (kcal/mol) | Hydrophobic Contacts                                                                                                               | Hydrogen Bonds |
|------------------|------------------------------------|------------------------------------------------------------------------------------------------------------------------------------|----------------|
| comp 1           | -                                  | V321, L324, F328, E331, V366, F382, L386, A396, G397, L398, F495, L500                                                             | -              |
| comp 2a (SO2 IN) | -7.7                               | V321, L324, F328, E331, M362, L365, V366, V369, F382, L386, A396, L398, V491, F495, V498, L500                                     | -              |
| comp 2b          | -6.2                               | V321, L324, S325, F382, L386, G397, L398, F495, V498, L500                                                                         | A396           |
| comp 3a (SO2 IN) | -7.6                               | L318, P319, V321, F328, E331, M362, L365, V366, V369, F382, L386, L388, A395, A396, G397, L398, L400, L405, V491, F495, V498, L500 | -              |
| comp 3b          | -6.9                               | V321, L324, L327, F328, E331, L365, V366, V369, F382, A395, A396, L398, L405, F495, V498                                           | G397           |
| XCT790           | -10.0                              | V321, L324, F328, E331, F382, A396, G397,                                                                                          | -              |

|  |  |                                    |  |
|--|--|------------------------------------|--|
|  |  | L398, V491, H494, F495, V498, L500 |  |
|--|--|------------------------------------|--|

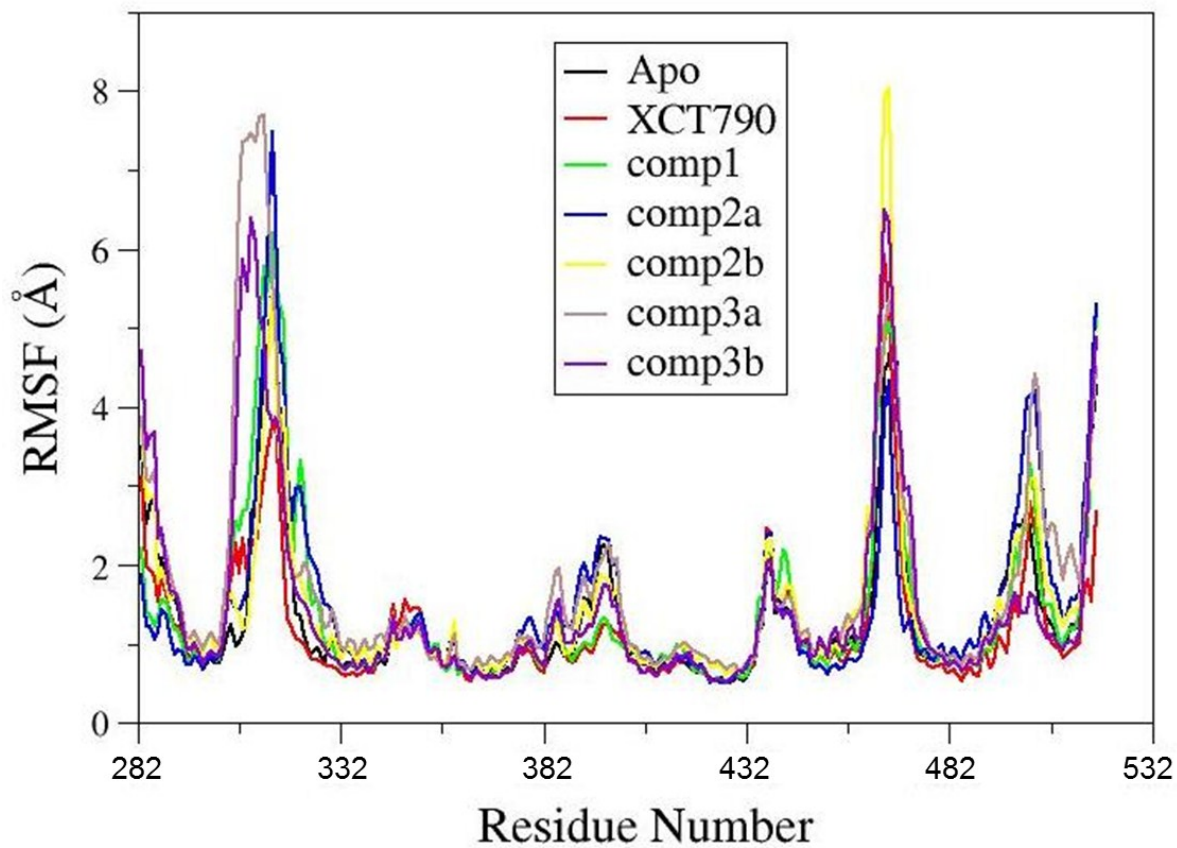

**Figure S1.** Root-mean-square fluctuation (RMSF) vs residue index for the ERR $\alpha$  apo structure and inhibitor bound complexes.

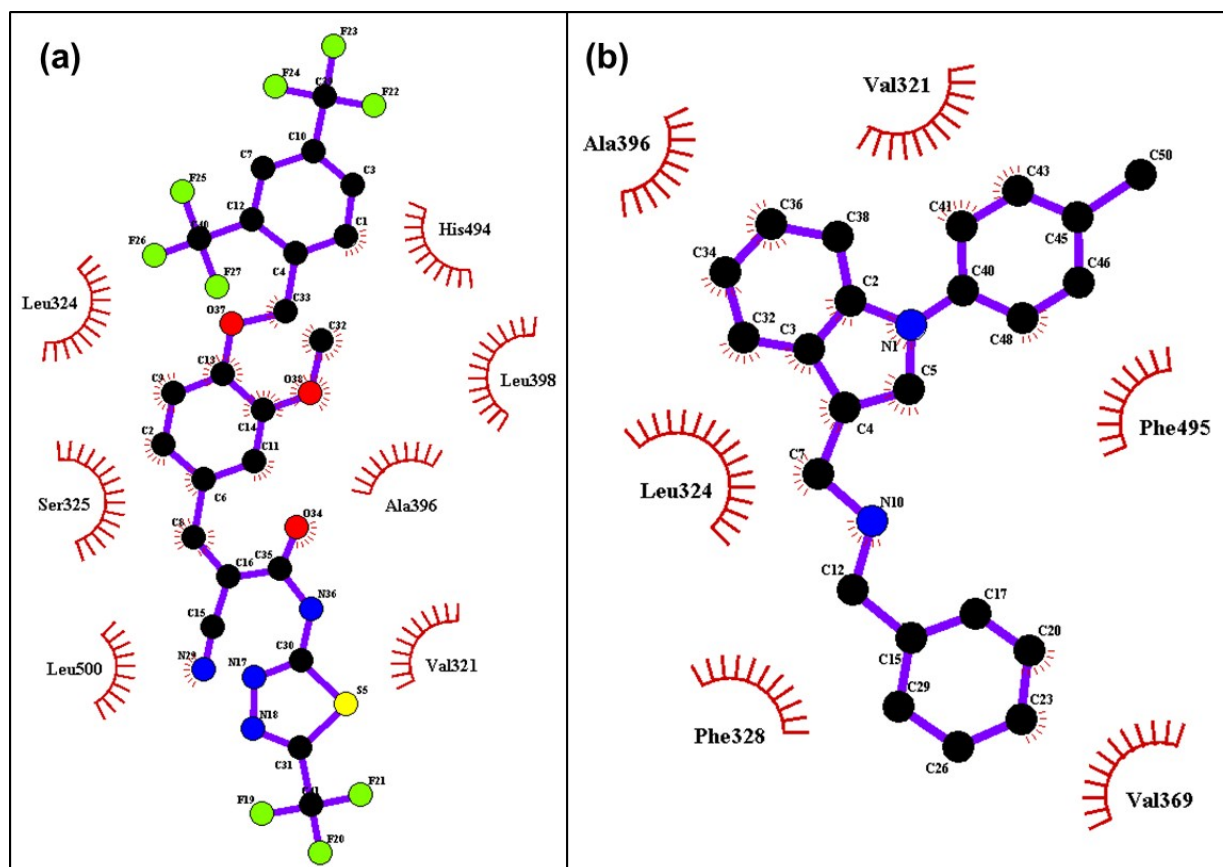

**Figure S2.** The interaction of XCT790 (a) and compound 1 (b) in the ligand binding domain of ERR $\alpha$  from the top cluster extracted from the MD trajectory.

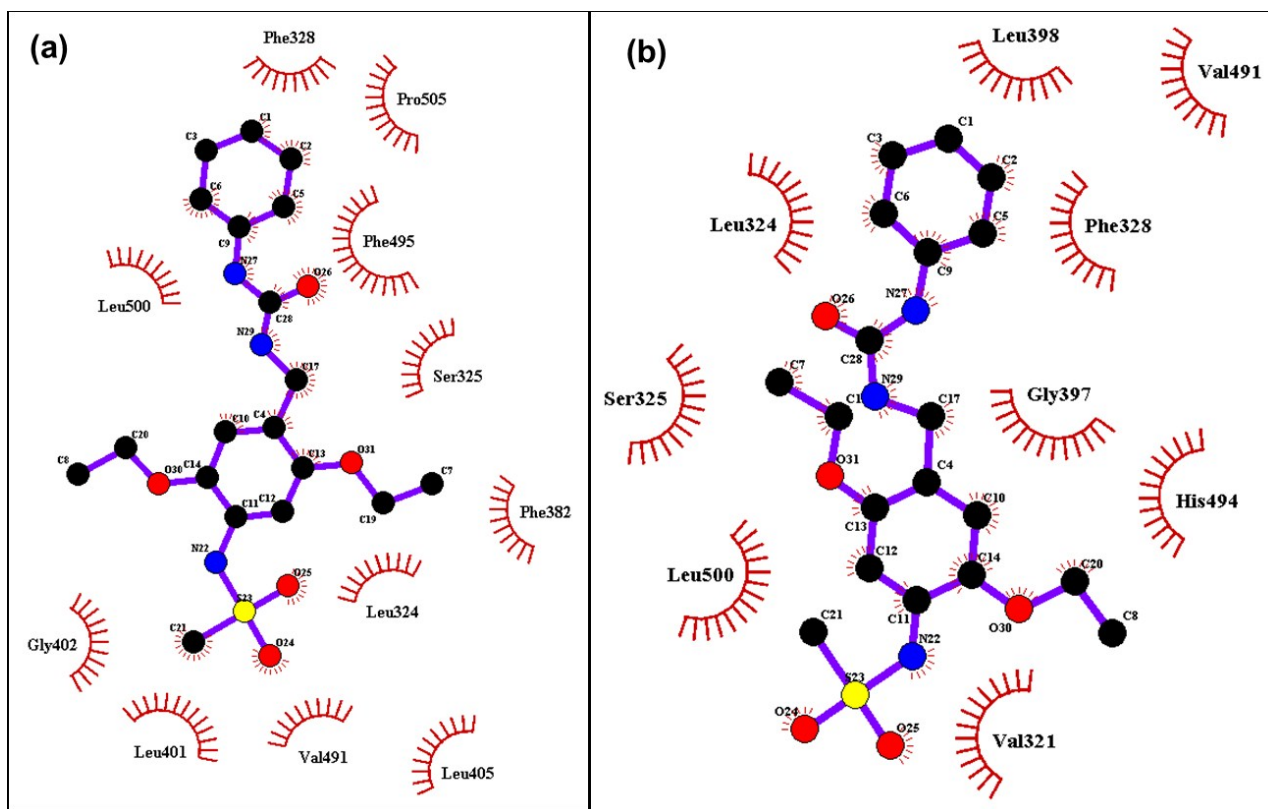

**Figure S3.** The interaction of compound 2a (a) and compound 2b (b) in the ligand binding domain of ERR $\alpha$  from the top cluster extracted from the MD trajectory.

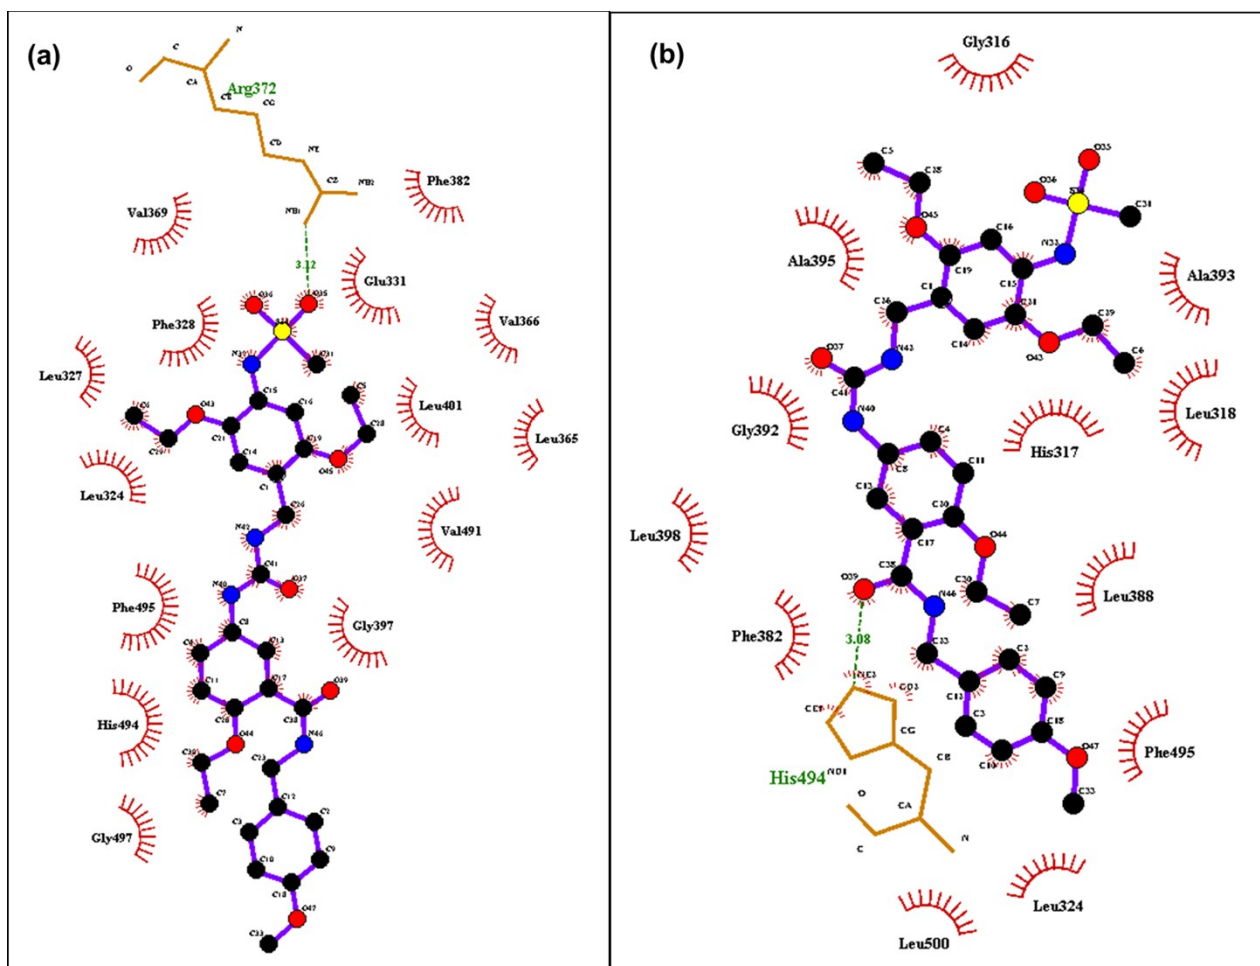

**Figure S4.** The interaction of compound 3a (a) and compound 3b (b) in the ligand binding domain of ERR $\alpha$  from the top cluster extracted from the MD trajectory.

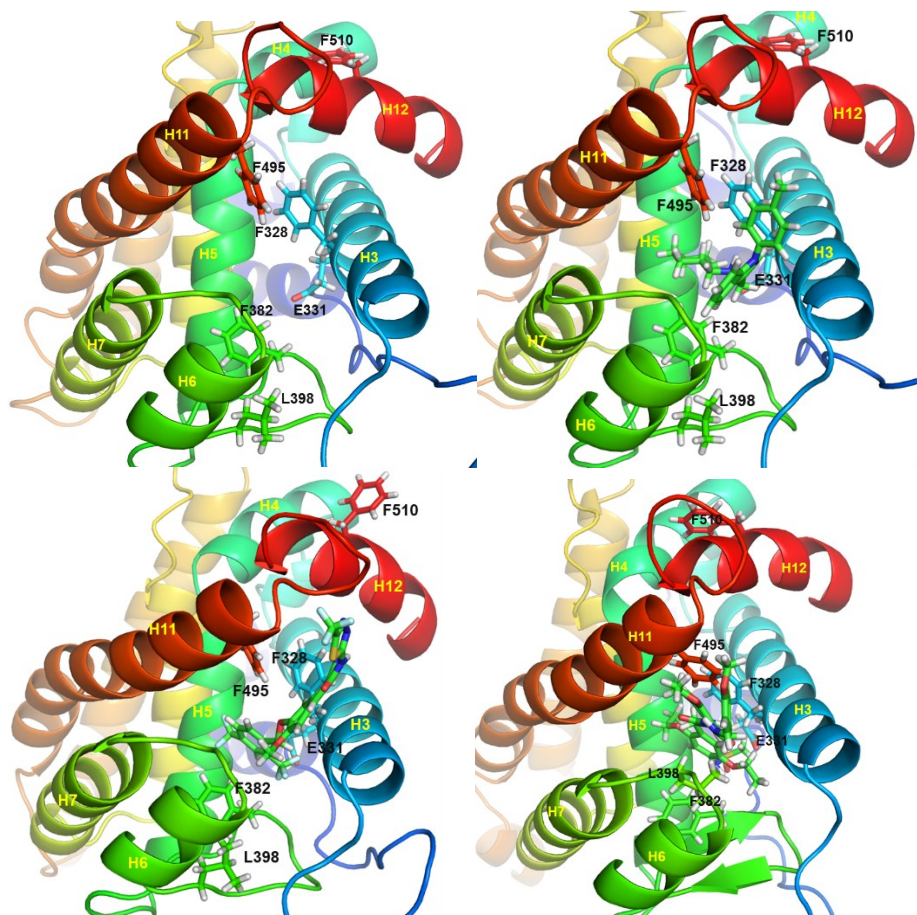

**Figure S5.** Depiction of aromatic side chains of Phe328(H3), Phe382(H5/H6 loop), Phe495(H11), Phe510(H12) cluster and side chains of Glu331(H3) and Leu398(H6/H7 loop) in the LBP of ERR $\alpha$ . (a) Apo-ERR $\alpha$ ; (b) compound 1/ ERR $\alpha$ ; (c) XCT790/ ERR $\alpha$ ; (d) Compound 3/ERR $\alpha$
